# Supplementary material
Source: Elsevier journal article supplement (https://www.sciencedirect.com/science/article/pii/S2387020620304320)
Supplement: mmc1 [file S2387020620304320:mmc1.docx]

TABLA Suplementaria.

**EVOLUCIÓN ANALÍTICA**

| **Cambio D-Dímero** | | | |
| --- | --- | --- | --- |
| **Variable** | **Categoría** | **Beta (IC95%)** | **p-valor** |
| Edad |  | 3.41 (80.4, 87.3) | 0.936 |
| Sexo | Hombre | Ref | 0.629 |
| Mujer | -592.3 (-80.4, 1825,4) |
| Grupo | O | Ref | 0.156 |
| A | 2392.7 (-90.5, 4875.9) |
| AB | 2002.0 (-2207.1, 6011.1) |
| D-Dímero inicio |  | 0.20 (-0.24, 0.64) | 0.363 |
| **Cambio Fibrinógeno** | | | |
| **Variable** | **Categoría** | **Beta (IC95%)** | **p-valor** |
| Edad |  | 0.77 (-1.36, 2.89) | 0.476 |
| Sexo | Hombre | Ref | 0.957 |
| Mujer | 1.74 (-62.2, 65.7) |
| Grupo | O | Ref | 0.005 |
| A | 24.3 (66.9, 487.3) |
| AB | 162.5 (64.9, 260.2) |
| Fibrinógeno inicio |  | 0.39 (0.20, 0.57) | <0.001 |

Ref: referencia: IC95%: intervalo de confianza 95%
